# Supplementary material for: Meta-Prediction of the Effect of Methylenetetrahydrofolate Reductase Polymorphisms and Air Pollution on Alzheimer’s Disease Risk
Source: PubMed Central journal article supplement (PMC5295314; doi:10.3390/ijerph14010063), 2017-01-11
Supplement: ijerph-14-00063-s001.pdf [file ijerph-14-00063-s001.pdf]

# Supplementary Materials: Meta-Prediction of Methylenetetrahydrofolate Reductase Polymorphisms and Air Pollution on Risk of Alzheimer’s Disease

Suh-Mian Wu, Zhao-Feng Chen, Lufei Young and S. Pamela K. Shiao

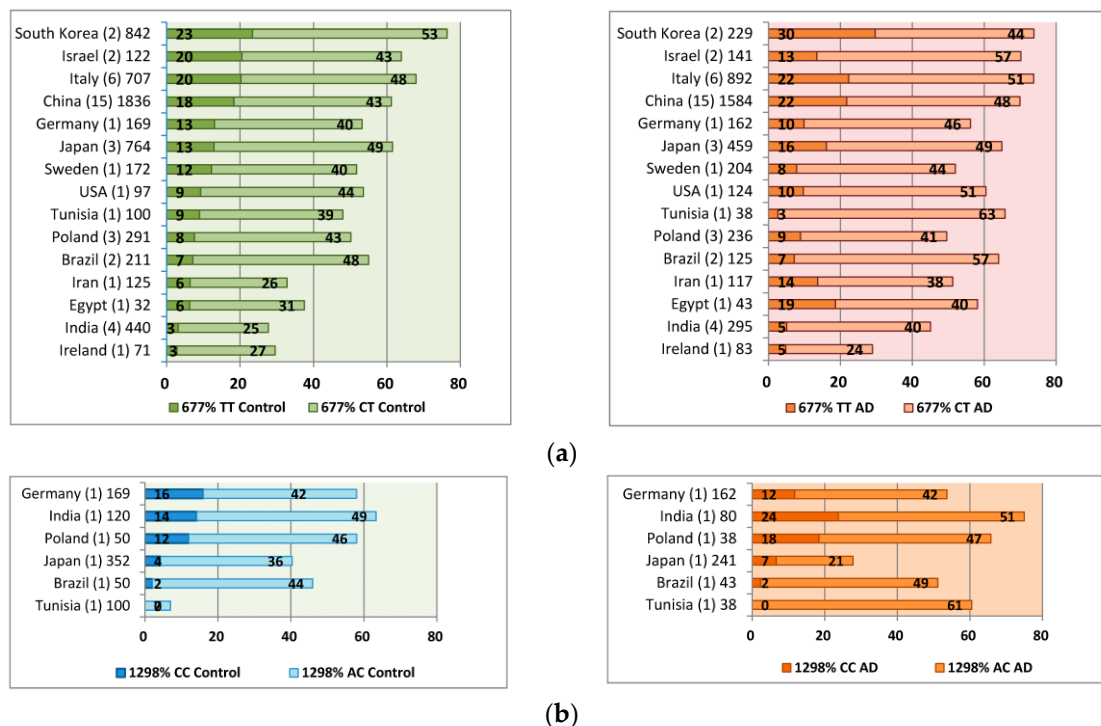

Figure S1. (a) *MTHFR* C677T percentage of mutations per control and Alzheimer’s (AD) case groups; (b) *MTHFR* A1298C percentage of mutations per control and Alzheimer’s (AD) case groups.

### Relative risk meta-analysis plot (fixed effects)

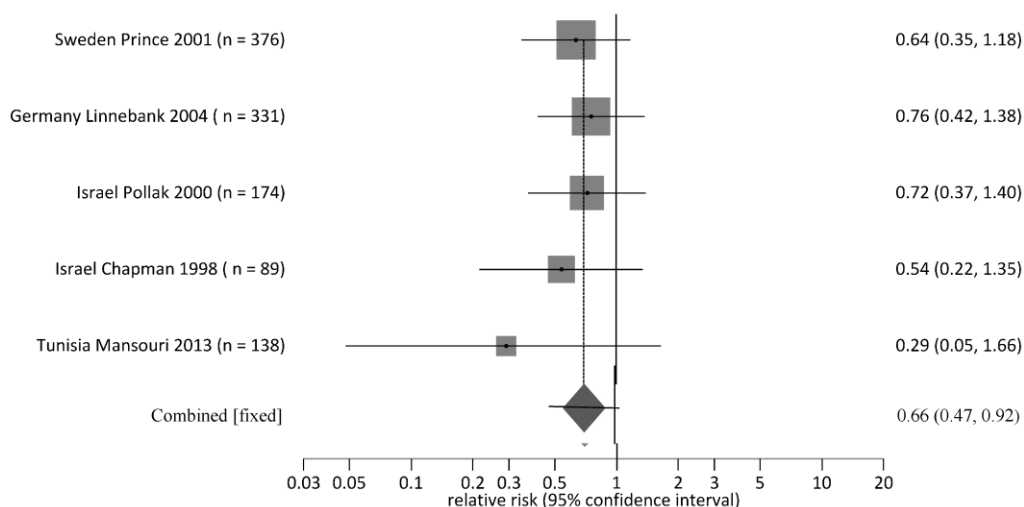

(a)

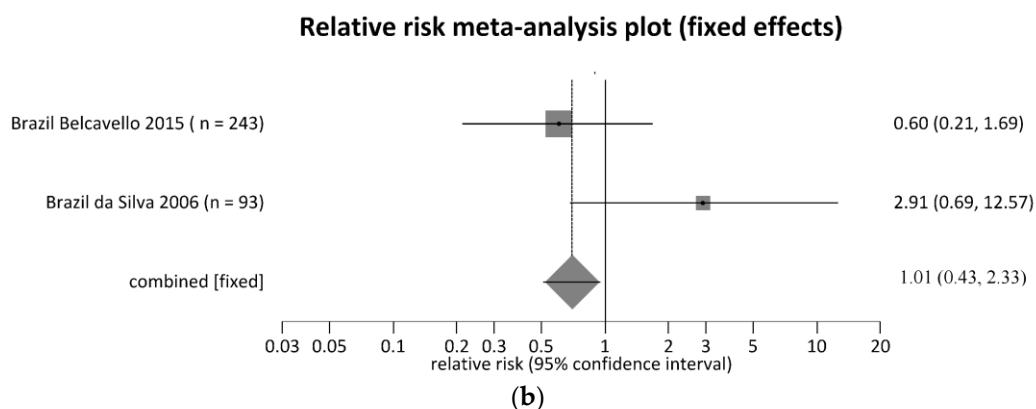

**Figure S2.** (a) Forest plot for meta-analysis of *MTHFR* C677T polymorphism by TT genotype, countries with risks <1; (b) Forest plot for meta-analysis of *MTHFR* C677T polymorphism by TT genotype, countries with risks varied ~1.

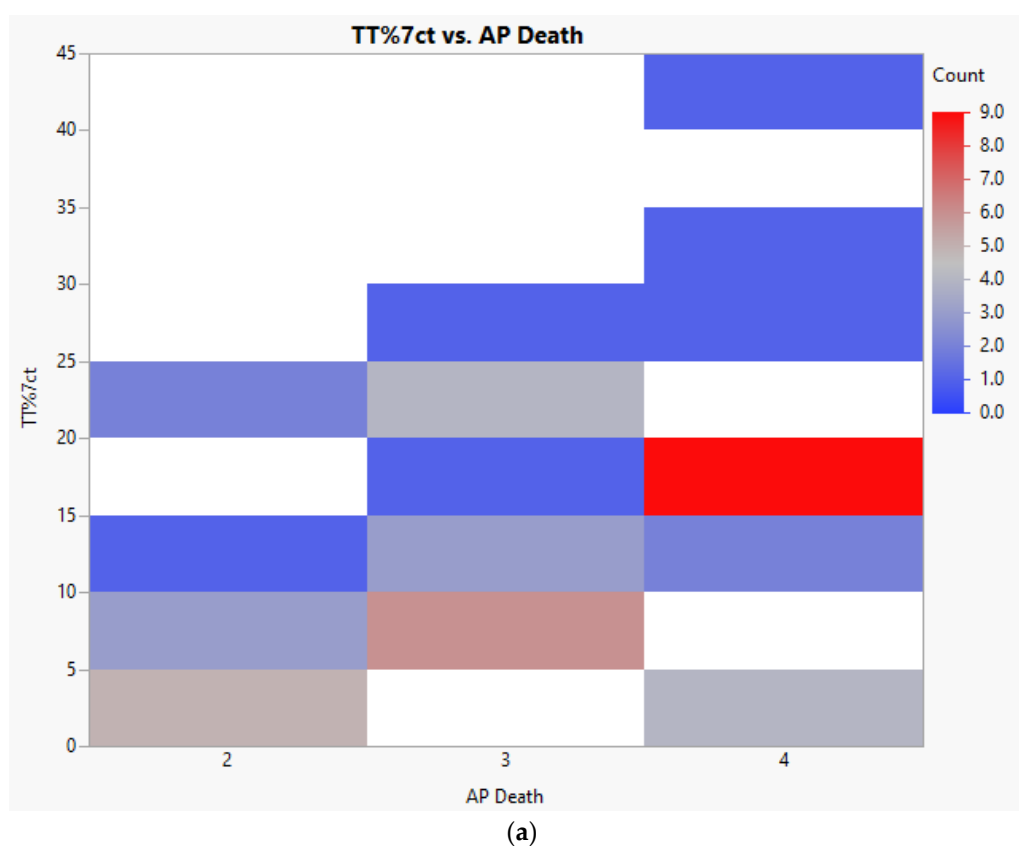

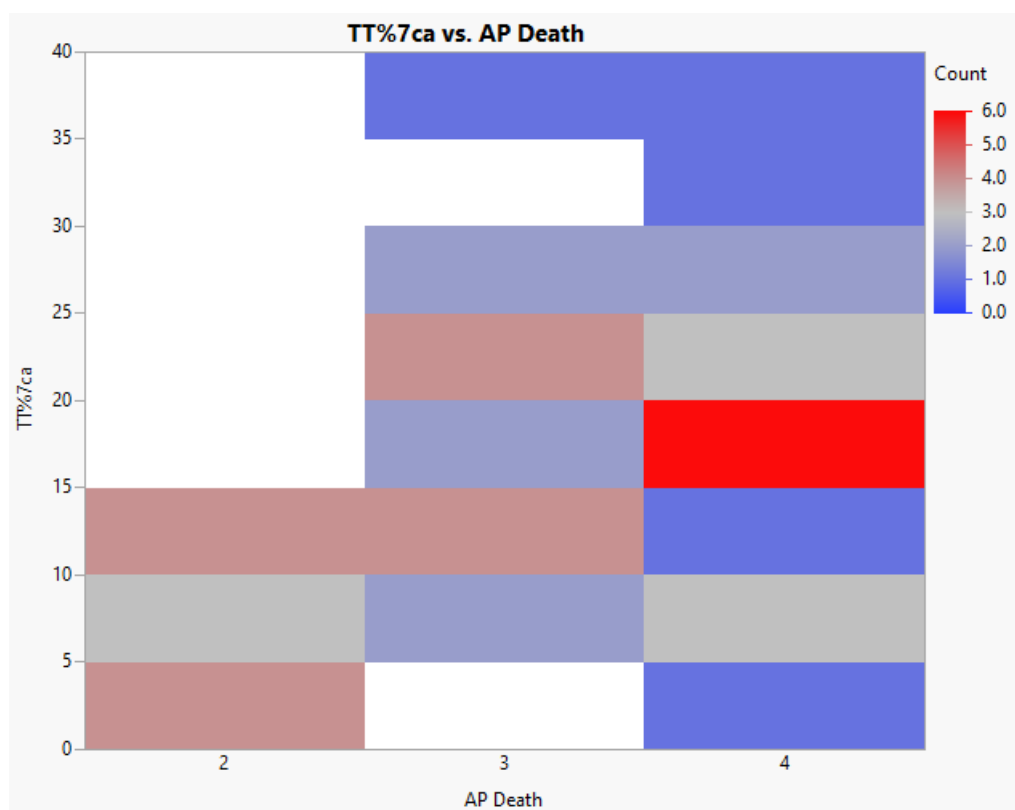

(b)

**Figure S3.** Heat maps of *MTHFR* C677T homozygous TT polymorphisms for control and case groups in association with annual deaths from air pollution (TT%7ct: percentage of *MTHFR* 677 TT in control group; TT%7ca: percentage of *MTHFR* 677 TT in case group; AP Death: Death rates per million population: Levels 2 = 50–100 deaths, 3 = 100–250 deaths, 4 = 250–400+ deaths).

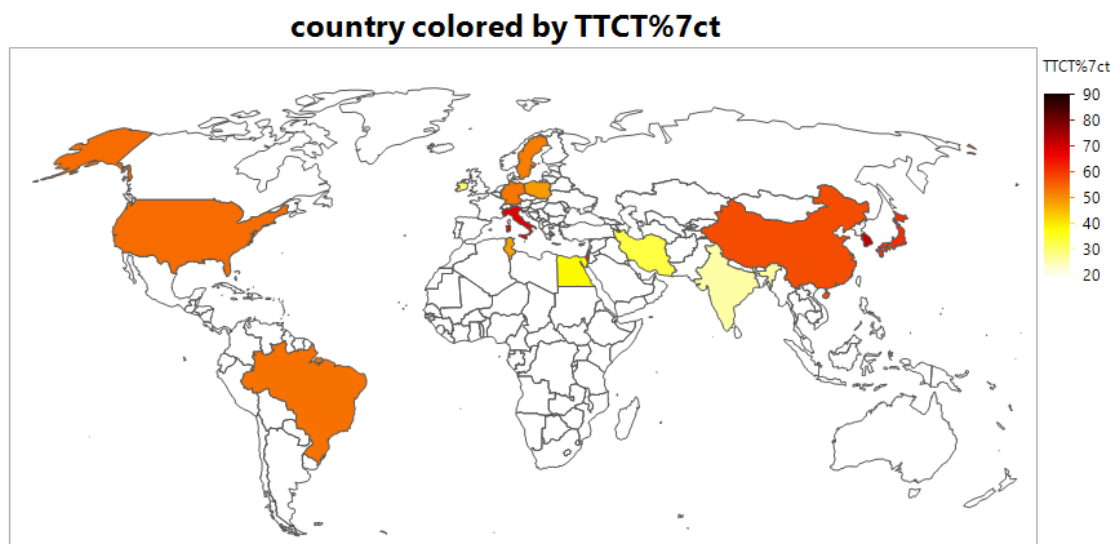

(a)

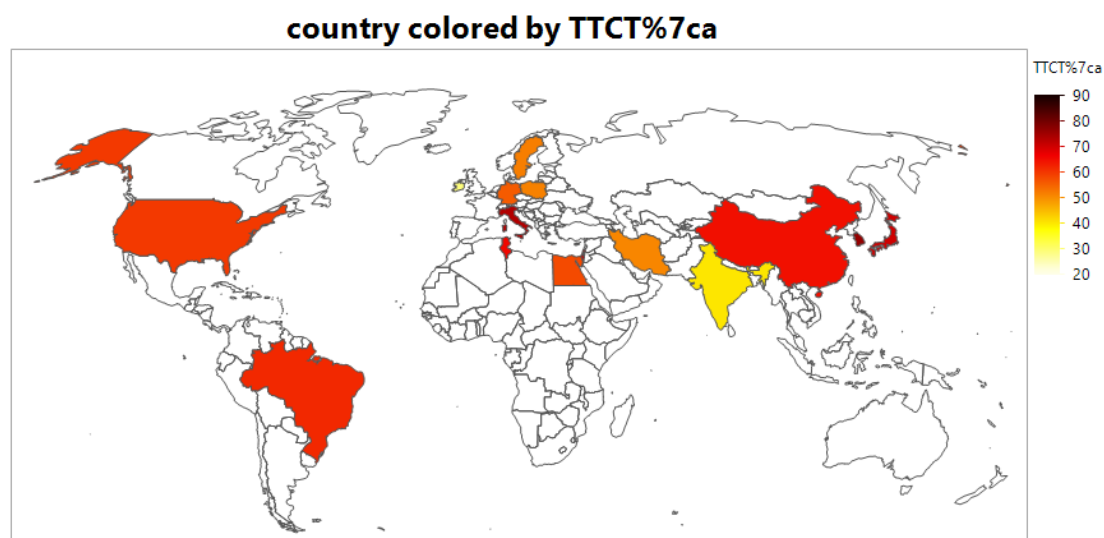

(b)

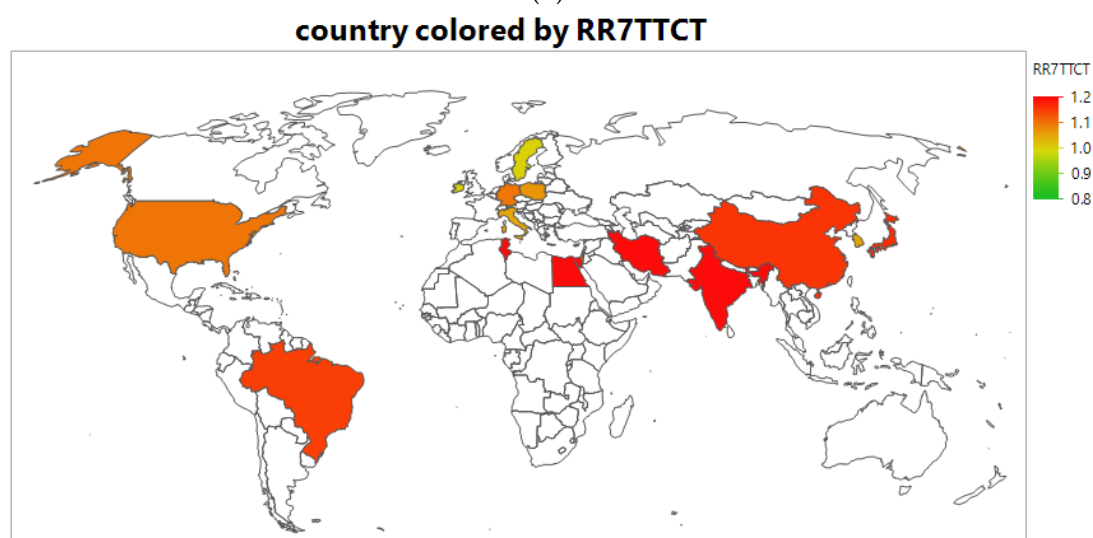

(c)

**Figure S4.** Geographic information maps for percentages of *MTHFR* C677T TT plus CT genotypes per control and Alzheimer's disease (AD) case groups, and their associations with AD risks (TTCT%7ct: percentage of *MTHFR* 677 TT + CT genotypes in control group; TTCT%7ca: percentage of *MTHFR* 677 TT + CT genotypes in case group; RR7TTCT: the relative risk between percentage of *MTHFR* 677 TT + CT genotypes and development of AD).

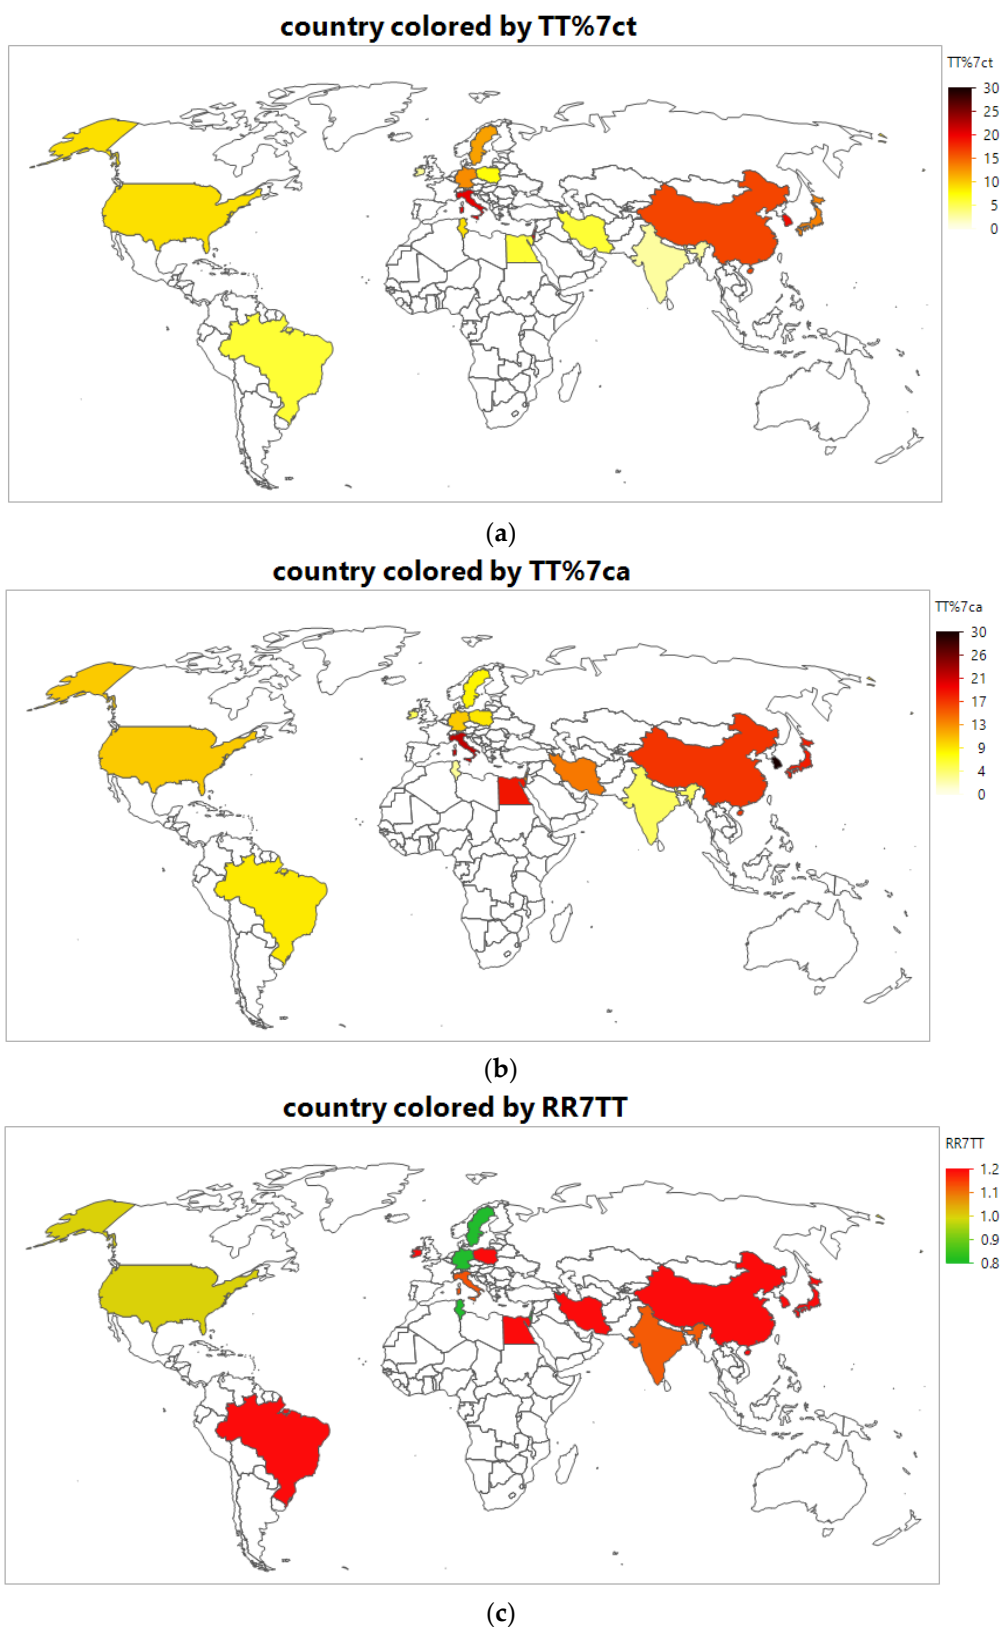

**Figure S5.** Geographic information maps for percentages of *MTHFR* C677T TT genotype per control and Alzheimer’s disease (AD) case groups, and its association with AD risks (TT%7ct: percentage of *MTHFR* 677 TT genotype in control group; TT%7ca: percentage of *MTHFR* 677 TT genotype in case group; RR7TT: the relative risk between percentage of *MTHFR* 677 TT genotype and development of AD).

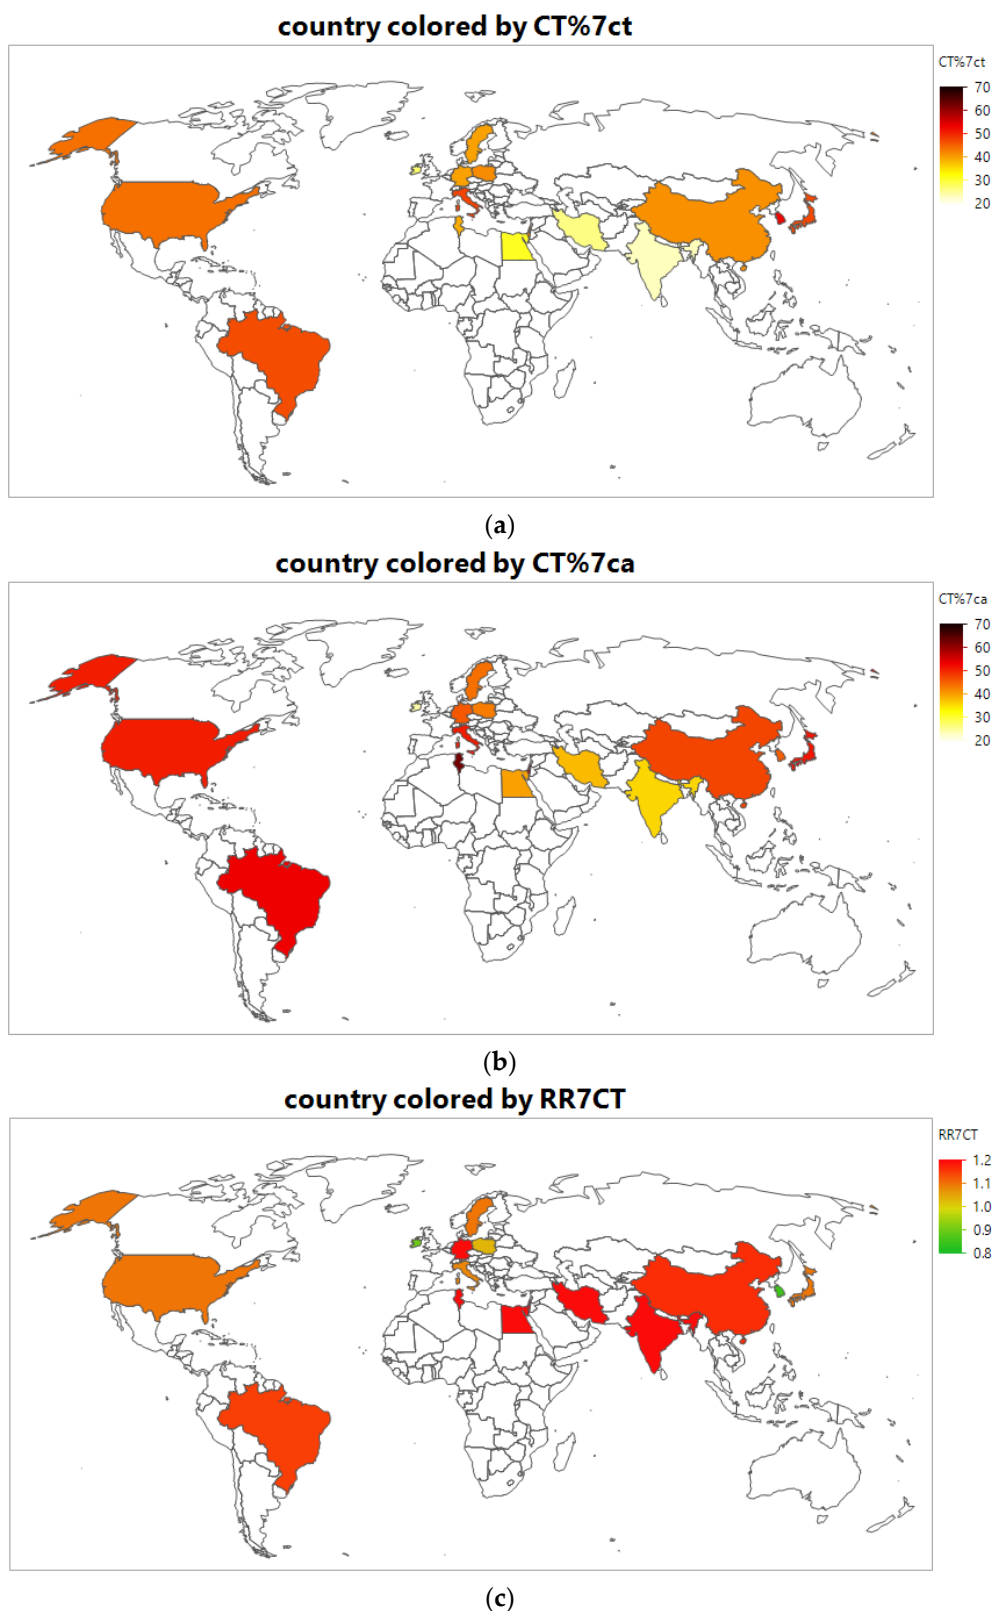

**Figure S6.** Geographic information maps for percentages of *MTHFR* C677T CT genotype per control and Alzheimer’s disease (AD) case groups, and its association with AD risks (CT%7ct: percentage of *MTHFR* 677 CT genotype in control group; CT%7ca: percentage of *MTHFR* 677 CT genotype in case group; RR7TT: the relative risk between percentage of *MTHFR* 677 CT genotype and development of AD).

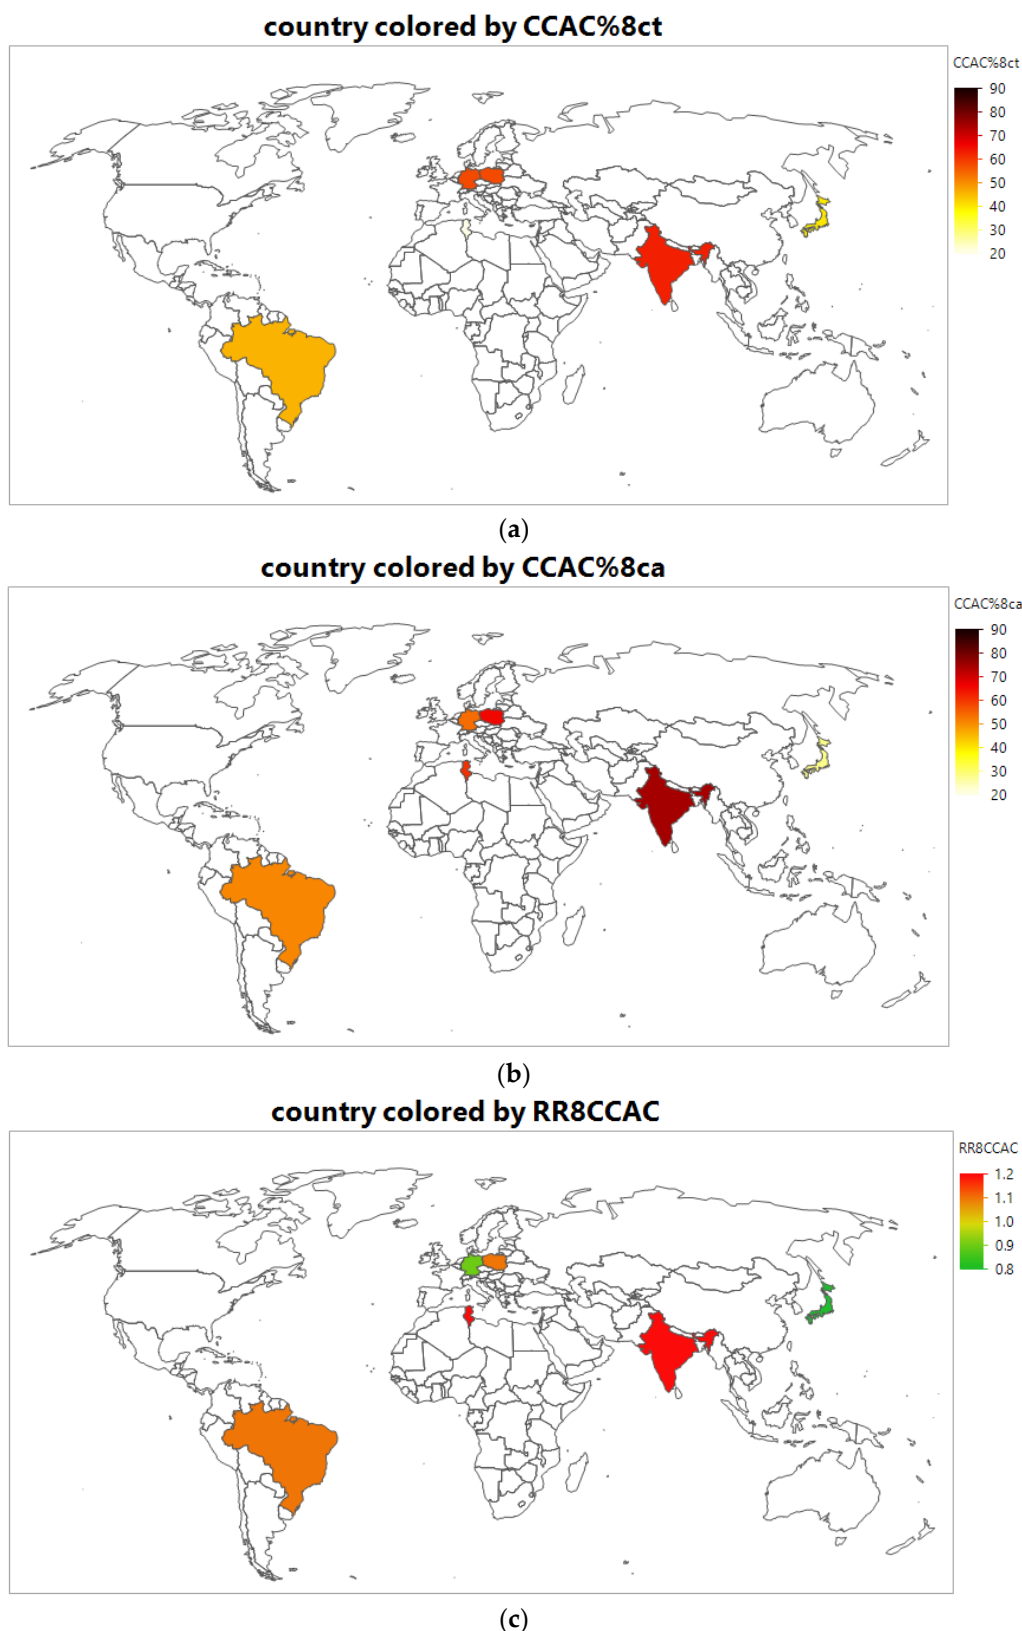

**Figure S7.** Geographic information maps for percentages of *MTHFR* A1298C CC + AC genotypes per control and Alzheimer's disease (AD) case groups, and their associations with AD risks (CCAC%8ct: percentage of *MTHFR* 1298 CC + AC genotypes in control group; CCAC%8ca: percentage of *MTHFR* 1298 CC + AC genotypes in case group; RR8CCAC: the relative risk between percentage of *MTHFR* 1298 CC + AC genotypes and development of AD).

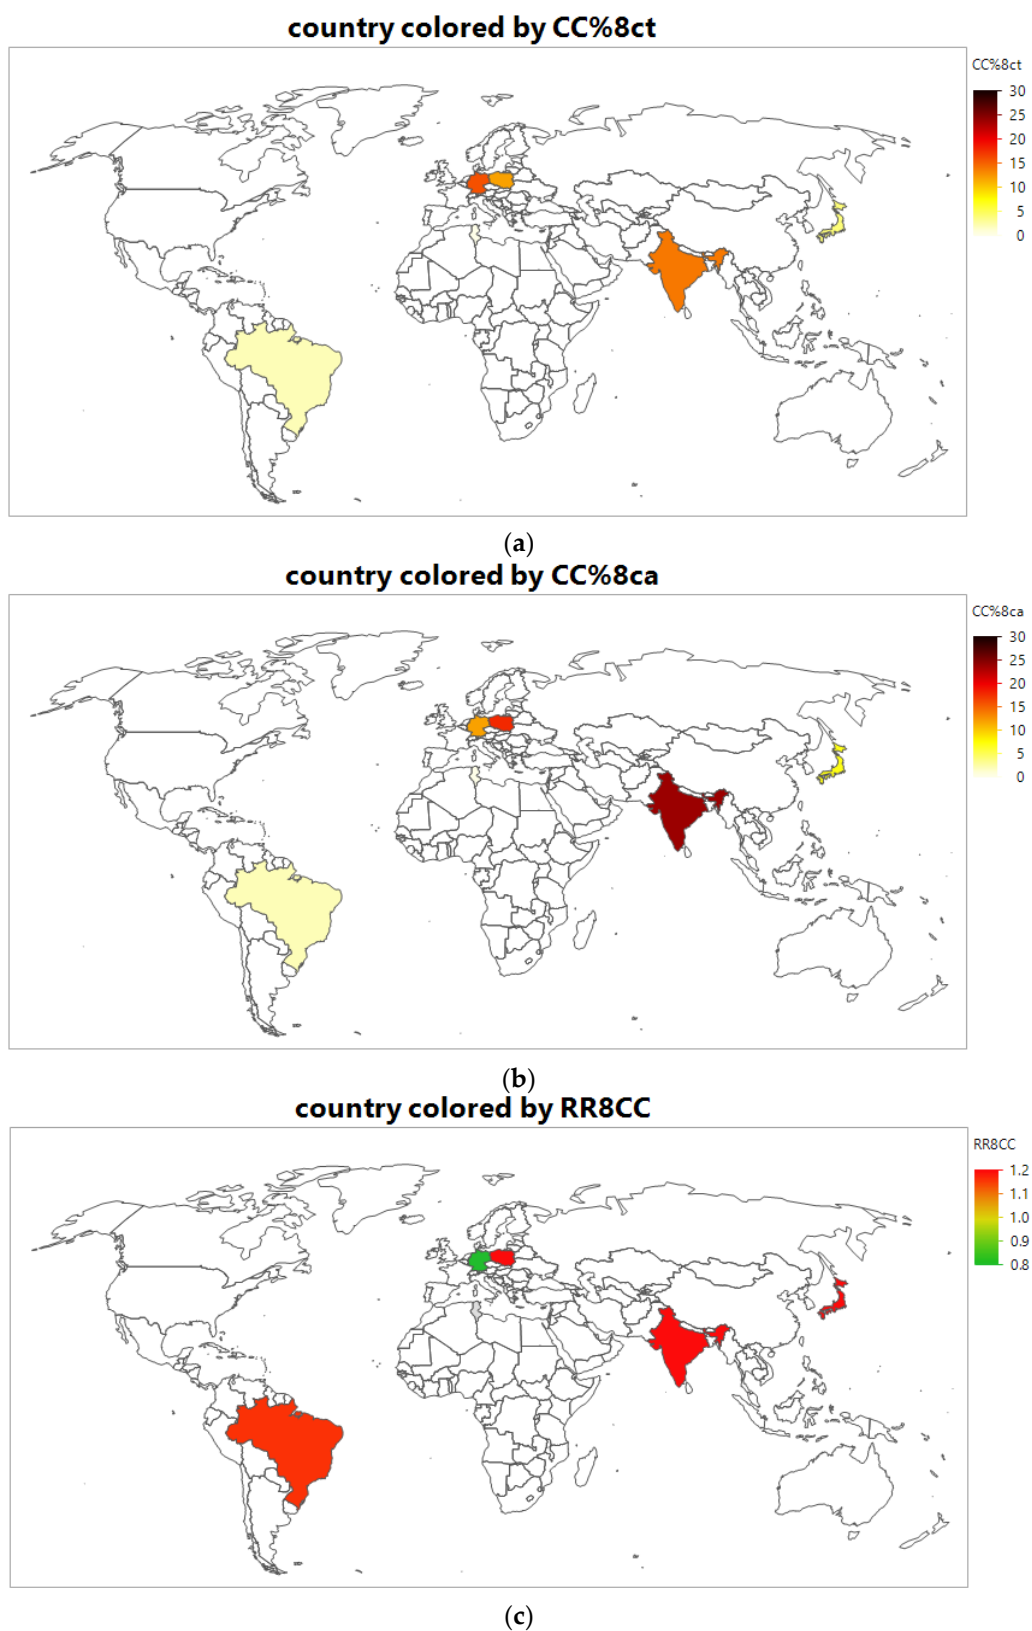

**Figure S8.** Geographic information maps for percentages of *MTHFR* A1298C CC genotype per control and Alzheimer’s disease (AD) case groups, and their associations with AD risks (CC%8ct: percentage of *MTHFR* 1298 CC genotype in control group; CC%8ca: percentage of *MTHFR* 1298 CC genotype in case group; RR8CC: the relative risk between percentage of *MTHFR* 1298 CC genotype and development of AD).



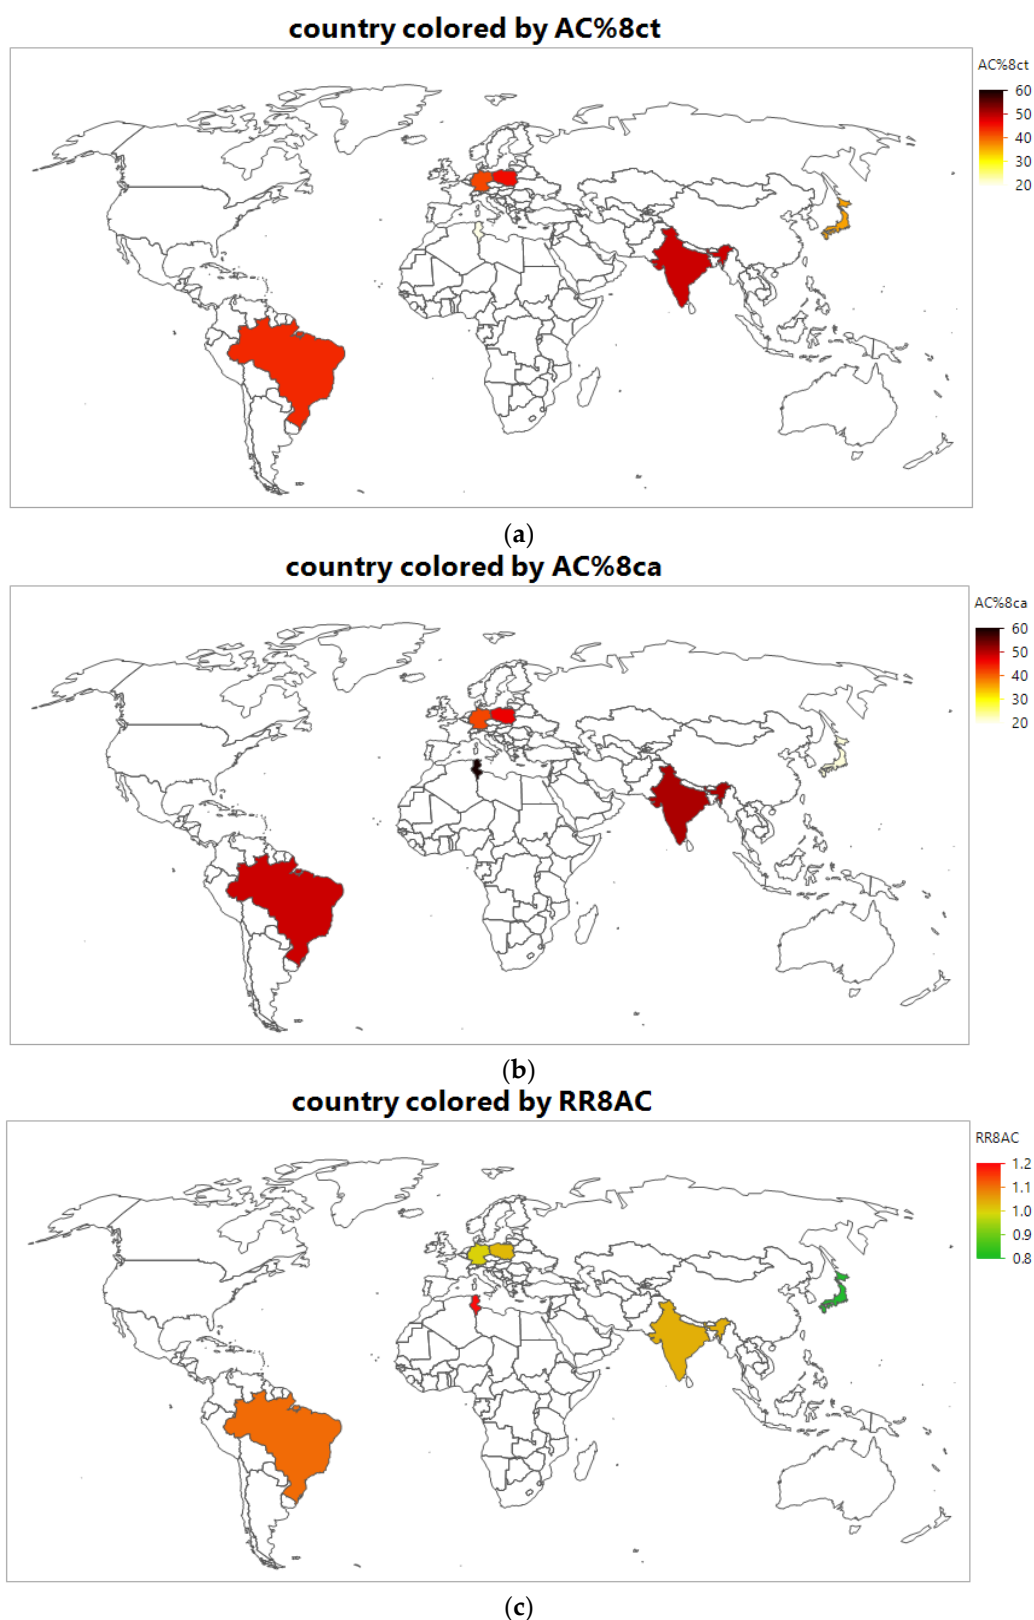

**Figure S9.** Geographic information maps for percentages of *MTHFR* A1298C AC genotype per control and Alzheimer’s disease (AD) case groups, and their associations with AD risks (AC%8ct: percentage of *MTHFR* 1298 AC genotype in control group; AC%8ca: percentage of *MTHFR* 1298 AC genotype in case group; RR8AC: the relative risk between percentage of *MTHFR* 1298 AC genotype and development of AD).

**Table S1.** Summary of *MTHFR* 677 and 1298 loci distributions for included studies on Alzheimer’s disease (AD) by geographic location (43 papers, 44 study groups with genotype counts for control groups).

| First Author<br>(Reference<br>Number) | Year | Ethnicity<br>-Country | MTHFR 677                 |              |               |              |                              |               |               |              |     | MTHFR 1298    |              |              |               |                 |              |     | Quality<br>Score |
|---------------------------------------|------|-----------------------|---------------------------|--------------|---------------|--------------|------------------------------|---------------|---------------|--------------|-----|---------------|--------------|--------------|---------------|-----------------|--------------|-----|------------------|
|                                       |      |                       | Cases, Source (sca) n (%) |              |               |              | Controls, Source (sct) n (%) |               |               |              |     | Cases, n (%)  |              |              |               | Controls, n (%) |              |     |                  |
|                                       |      |                       | SC                        | CC           | CT            | TT           | SCT                          | CC            | CT            | TT           | HWE | AA            | AC           | CC           | AA            | AC              | CC           | HWE |                  |
| <b>Europe</b>                         |      |                       |                           |              |               |              |                              |               |               |              |     |               |              |              |               |                 |              |     |                  |
| Prince [16]                           | 2001 | Caucasian<br>-Sweden  | 1                         | 98<br>(48.0) | 90<br>(44.1)  | 16<br>(7.8)  | 1                            | 83<br>(48.3)  | 68<br>(39.5)  | 21<br>(12.2) | Yes |               |              |              |               |                 |              |     | 21<br>(9, 7, 5)  |
| Dorszewsk [17]                        | 2007 | Caucasian<br>-Poland  | 1                         | 15<br>(39.5) | 20<br>(52.6)  | 3<br>(7.9)   | 2                            | 27<br>(54.0)  | 20<br>(40.0)  | 3<br>(6.0)   | Yes | 13<br>(34.2)  | 18<br>(47.4) | 7<br>(18.4)  | 21<br>(42.0)  | 23<br>(46.0)    | 6<br>(12.0)  | Yes | 20<br>(7, 8, 5)  |
| Wehr [18]                             | 2006 | Caucasian<br>-Poland  | 1                         | 51<br>(51.5) | 38<br>(38.4)  | 10<br>(10.1) | 1                            | 63<br>(44.7)  | 66<br>(46.8)  | 12<br>(8.5)  | Yes |               |              |              |               |                 |              |     | 20<br>(9, 5, 6)  |
| Religa [19]                           | 2003 | Caucasian<br>-Poland  | 1                         | 53<br>(53.5) | 38<br>(38.4)  | 8<br>(8.1)   | 1                            | 55<br>(55.0)  | 38<br>(38.0)  | 7<br>(7.0)   | Yes |               |              |              |               |                 |              |     | 22<br>(8, 8, 6)  |
| Linnebank [20]                        | 2004 | Caucasian<br>-Germany | 1                         | 71<br>(43.8) | 75<br>(46.3)  | 16<br>(9.9)  | 1                            | 79<br>(46.7)  | 68<br>(40.2)  | 22<br>(13.0) | Yes | 75<br>(46.3)  | 68<br>(42.0) | 19<br>(11.7) | 71<br>(42.0)  | 71<br>(42.0)    | 27<br>(16.0) | Yes | 15<br>(9, 2, 4)  |
| Copped [21]                           | 2012 | Caucasian<br>-Italy   | 1                         | 99<br>(26.2) | 193<br>(51.1) | 86<br>(22.8) | 1                            | 106<br>(34.8) | 142<br>(46.6) | 57<br>(18.7) | Yes |               |              |              |               |                 |              |     | 22<br>(9, 8, 5)  |
| Ferlazzo [22]                         | 2011 | Caucasian<br>-Italy   | 1                         | 17<br>(24.6) | 32<br>(46.4)  | 20<br>(29.0) | 2                            | 26<br>(37.7)  | 33<br>(47.8)  | 10<br>(14.5) | Yes |               |              |              |               |                 |              |     | 21<br>(8, 8, 5)  |
| Seripa [27]                           | 2003 | Caucasian<br>-Italy   | 1                         | 30<br>(23.8) | 67<br>(53.2)  | 29<br>(23.0) | 1                            | 28<br>(26.4)  | 55<br>(51.9)  | 23<br>(21.7) | Yes |               |              |              |               |                 |              |     | 22<br>(9, 7, 6)  |
| Zuliani [23]                          | 2001 | Caucasian<br>-Italy   | 1                         | 14<br>(35.0) | 18<br>(45.0)  | 8<br>(20.0)  | 2                            | 17<br>(31.5)  | 25<br>(46.3)  | 12<br>(22.2) | Yes |               |              |              |               |                 |              |     | 21<br>(8, 7, 6)  |
| Bottiglieri [24]                      | 2001 | Caucasian<br>-Italy   | 1                         | 10<br>(20.8) | 29<br>(60.4)  | 9<br>(18.8)  | 1                            | 11<br>(30.6)  | 17<br>(47.2)  | 8<br>(22.2)  | Yes |               |              |              |               |                 |              |     | 22<br>(8, 8, 6)  |
| Brunelli [25]                         | 2001 | Caucasian<br>-Italy   | 1                         | 64<br>(27.7) | 120<br>(51.9) | 47<br>(20.3) | 1                            | 39<br>(28.5)  | 65<br>(47.4)  | 33<br>(24.1) | Yes |               |              |              |               |                 |              |     | 22<br>(9, 7, 6)  |
| McIlroy [26]                          | 2002 | Caucasian<br>-Ireland | 1                         | 59<br>(71.1) | 20<br>(24.1)  | 4<br>(4.8)   | 1                            | 50<br>(70.4)  | 19<br>(26.8)  | 2<br>(2.8)   | Yes |               |              |              |               |                 |              |     | 24<br>(10, 8, 6) |
| <b>North America</b>                  |      |                       |                           |              |               |              |                              |               |               |              |     |               |              |              |               |                 |              |     |                  |
| Seripa [27]                           | 2003 | Caucasian<br>-USA     | 1                         | 49<br>(39.5) | 63<br>(50.8)  | 12<br>(9.7)  | 1                            | 45<br>(46.4)  | 43<br>(44.3)  | 9<br>(9.3)   | Yes |               |              |              |               |                 |              |     | 22<br>(9, 7, 6)  |
| <b>South America</b>                  |      |                       |                           |              |               |              |                              |               |               |              |     |               |              |              |               |                 |              |     |                  |
| Belcavello [28]                       | 2015 | Mixed<br>-Brazil      | 1                         | 26<br>(31.7) | 52<br>(63.4)  | 4<br>(4.9)   | 1                            | 70<br>(43.5)  | 78<br>(48.4)  | 13<br>(8.1)  | Yes |               |              |              |               |                 |              |     | 21<br>(9, 7, 5)  |
| da Silva [29]                         | 2006 | Mixed<br>-Brazil      | 1                         | 19<br>(44.2) | 19<br>(44.2)  | 5<br>(11.6)  | 2                            | 25<br>(50.0)  | 23<br>(46.0)  | 2<br>(4.0)   | Yes | 21<br>(48.8)  | 21<br>(48.8) | 1<br>(2.3)   | 27<br>(54.0)  | 22<br>(44.0)    | 1<br>(2.0)   | Yes | 21<br>(9, 7, 5)  |
| <b>Asia</b>                           |      |                       |                           |              |               |              |                              |               |               |              |     |               |              |              |               |                 |              |     |                  |
| Kida [30]                             | 2004 | Asian<br>-Japan       | 1                         | 64<br>(33.0) | 98<br>(50.5)  | 32<br>(16.5) | 1                            | 144<br>(38.0) | 193<br>(50.9) | 42<br>(11.1) | Yes |               |              |              |               |                 |              |     | 22<br>(8, 8, 6)  |
| Wakutani [31]                         | 2002 | Asian<br>-Japan       | 1                         | 93<br>(38.6) | 112<br>(46.5) | 36<br>(14.9) | 1                            | 137<br>(38.9) | 163<br>(46.3) | 52<br>(14.8) | Yes | 174<br>(72.2) | 51<br>(21.2) | 16<br>(6.6)  | 210<br>(59.7) | 127<br>(36.1)   | 15<br>(4.3)  | Yes | 9<br>(3, 1, 5)   |

|                |      |                          |   |              |               |               |   |               |               |               |     |                          |
|----------------|------|--------------------------|---|--------------|---------------|---------------|---|---------------|---------------|---------------|-----|--------------------------|
| Nishiyama [32] | 2000 | Asian<br>-Japan          | 1 | 4<br>(16.7)  | 14<br>(58.3)  | 6<br>(25.0)   | 2 | 13<br>(39.4)  | 15<br>(45.5)  | 5<br>(15.2)   | Yes | 22<br>(8, 8, 6)          |
| Kim [33]       | 2008 | Asian<br>-South<br>Korea | 1 | 11<br>(12.8) | 43<br>(50.0)  | 32<br>(37.2)  | 2 | 122<br>(19.5) | 332<br>(53.1) | 171<br>(27.4) | Yes | 24<br>(11, 8, 5)         |
| Yoo [34]       | 2000 | Asian<br>-South<br>Korea | 2 | 49<br>(34.3) | 58<br>(40.6)  | 36<br>(25.2)  | 1 | 77<br>(35.5)  | 114<br>(52.5) | 26<br>(12.0)  | Yes | 21<br>(8, 7, 6)          |
| Deng [35]      | 2012 | Asian<br>-China          | 1 | 45<br>(60.0) | 27<br>(36.0)  | 3<br>(4.0)    | 1 | 48<br>(67.6)  | 21<br>(29.6)  | 2<br>(2.8)    | Yes | 21<br>(8, 8, 5)          |
| Bi [36]        | 2009 | Asian<br>-China          | 1 | 82<br>(21.2) | 179<br>(46.4) | 125<br>(32.4) | 1 | 90<br>(24.0)  | 172<br>(45.9) | 113<br>(30.1) | Yes | 23<br>(9, 8, 6)          |
| Li [37]        | 2009 | Asian<br>-China          | 1 | 37<br>(18.7) | 92<br>(46.5)  | 69<br>(34.8)  | 1 | 69<br>(28.8)  | 103<br>(42.9) | 68<br>(28.3)  | No  | 21<br>(9, 7, 5)          |
| Sun [38]       | 2008 | Asian<br>-China          | 1 | 20<br>(31.3) | 30<br>(46.9)  | 14<br>(21.9)  | 1 | 27<br>(48.2)  | 21<br>(37.5)  | 8<br>(14.3)   | Yes | 24<br>(11, 8, 5)         |
| Zhang [39]     | 2008 | Asian<br>-China          | 1 | 21<br>(48.8) | 14<br>(32.6)  | 8<br>(18.6)   | 1 | 20<br>(50.0)  | 13<br>(32.5)  | 7<br>(17.5)   | Yes | 21<br>(8, 8, 5)          |
| Zhang [40]     | 2007 | Asian<br>-China          | 1 | 6<br>(8.8)   | 44<br>(64.7)  | 18<br>(26.5)  | 1 | 11<br>(16.2)  | 29<br>(42.6)  | 28<br>(41.2)  | Yes | 21<br>(9, 7, 5)          |
| Yuan [41]      | 2007 | Asian<br>-China          | 1 | 11<br>(36.7) | 13<br>(43.3)  | 6<br>(20.0)   | 1 | 27<br>(33.8)  | 38<br>(47.5)  | 15<br>(18.8)  | Yes | 22<br>(9, 8, 5)          |
| Wu [42]        | 2006 | Asian<br>-China          | 1 | 35<br>(25.9) | 75<br>(55.6)  | 25<br>(18.5)  | 1 | 41<br>(29.7)  | 73<br>(52.9)  | 24<br>(17.4)  | Yes | 22<br>(8, 8, 6)          |
| Huang [43]     | 2006 | Asian<br>-China          | 1 | 26<br>(39.4) | 37<br>(56.1)  | 3<br>(4.5)    | 1 | 90<br>(62.9)  | 50<br>(35.0)  | 3<br>(2.1)    | Yes | 20<br>(8, 7, 5)          |
| Wang [44]      | 2005 | Asian<br>-China          | 1 | 50<br>(48.1) | 38<br>(36.5)  | 16<br>(15.4)  | 1 | 79<br>(60.8)  | 47<br>(36.2)  | 4<br>(3.1)    | Yes | 22<br>(9, 7, 6)          |
| Zhang [45]     | 2005 | Asian<br>-China          | 1 | 39<br>(37.1) | 45<br>(42.9)  | 21<br>(20.0)  | 2 | 34<br>(33.3)  | 49<br>(48.0)  | 19<br>(18.6)  | Yes | 21<br>(9, 7, 5)          |
| Jiang [46]     | 2004 | Asian<br>-China          | 1 | 22<br>(29.3) | 46<br>(61.3)  | 7<br>(9.3)    | 1 | 24<br>(33.3)  | 36<br>(50.0)  | 12<br>(16.7)  | Yes | 24<br>(11, 7, 6)         |
| Bi [47]        | 2004 | Asian<br>-China          | 1 | 23<br>(54.8) | 13<br>(31.0)  | 6<br>(14.3)   | 1 | 21<br>(52.5)  | 12<br>(30.0)  | 7<br>(17.5)   | No  | 23<br>(10, 8, 5)         |
| Wang [48]      | 2004 | Asian<br>-China          | 1 | 33<br>(26.0) | 74<br>(58.3)  | 20<br>(15.7)  | 1 | 41<br>(29.7)  | 73<br>(52.9)  | 24<br>(17.4)  | Yes | 21<br>(8, 8, 5)          |
| Liao [49]      | 2004 | Asian<br>-China          | 1 | 26<br>(39.4) | 37<br>(56.1)  | 3<br>(4.5)    | 1 | 90<br>(62.9)  | 50<br>(35.0)  | 3<br>(2.1)    | Yes | 21<br>(10, 7, 4)         |
| Chhillar [50]  | 2014 | Asian<br>-India          | 1 | 31<br>(31.0) | 58<br>(58.0)  | 11<br>(11.0)  | 1 | 69<br>(69.0)  | 26<br>(26.0)  | 5<br>(5.0)    | Yes | 21<br>(8, 7, 6)          |
| Divyakolu [51] | 2014 | Asian<br>-India          | 1 | 19<br>(76.0) | 5<br>(20.0)   | 1<br>(4.0)    | 1 | 42<br>(84.0)  | 8<br>(16.0)   | 0<br>(0.0)    | Yes | 19<br>(8,5,6)            |
| Mansoori [52]  | 2012 | Asian                    | 1 | 51           | 26            | 3             | 1 | 89            | 29            | 2             | Yes | 20 41 19 44 59 17 Yes 21 |

|                    |      |                     |   |              |              |              |   |               |              |              |     |              |              |            |              |            |            |     |                 |
|--------------------|------|---------------------|---|--------------|--------------|--------------|---|---------------|--------------|--------------|-----|--------------|--------------|------------|--------------|------------|------------|-----|-----------------|
|                    |      | -India              |   | (63.8)       | (32.5)       | (3.8)        |   | (74.2)        | (24.2)       | (1.7)        |     | (25.0)       | (51.3)       | (23.8)     | (36.7)       | (49.2)     | (14.2)     |     | (8, 8, 5)       |
| Pandey [53]        | 2009 | Asian<br>-India     | 1 | 61<br>(67.8) | 29<br>(32.2) | 0<br>(0.0)   | 1 | 118<br>(69.4) | 45<br>(26.5) | 7<br>(4.1)   | Yes |              |              |            |              |            |            |     | 22<br>(9, 7, 6) |
| <b>Middle-East</b> |      |                     |   |              |              |              |   |               |              |              |     |              |              |            |              |            |            |     |                 |
| Keikhaee [54]      | 2006 | Mid-East<br>-Iran   | 1 | 57<br>(48.7) | 44<br>(37.6) | 16<br>(13.7) | 1 | 84<br>(67.2)  | 33<br>(26.4) | 8<br>(6.4)   | Yes |              |              |            |              |            |            |     | 21<br>(9, 7, 5) |
| Pollak [55]        | 2000 | Mid-East<br>-Israel | 1 | 30<br>(32.6) | 49<br>(53.2) | 13<br>(14.1) | 1 | 29<br>(35.4)  | 37<br>(45.1) | 16<br>(19.5) | Yes |              |              |            |              |            |            |     | 21<br>(8, 7, 6) |
| Chapman [56]       | 1998 | Mid-East<br>-Israel | 1 | 12<br>(24.5) | 31<br>(63.3) | 6<br>(12.2)  | 1 | 15<br>(37.5)  | 16<br>(40.0) | 9<br>(22.5)  | Yes |              |              |            |              |            |            |     | 18<br>(7, 5, 6) |
| <b>Africa</b>      |      |                     |   |              |              |              |   |               |              |              |     |              |              |            |              |            |            |     |                 |
| Elhawary [57]      | 2013 | African<br>-Egypt   | 1 | 18<br>(41.9) | 17<br>(39.5) | 8<br>(18.6)  | 2 | 20<br>(62.5)  | 10<br>(31.3) | 2<br>(6.3)   | Yes |              |              |            |              |            |            |     | 23<br>(9, 7, 7) |
| Mansouri [58]      | 2013 | African<br>-Tunisia | 1 | 13<br>(34.2) | 24<br>(63.2) | 1<br>(2.6)   | 1 | 52<br>(52.0)  | 39<br>(39.0) | 9<br>(9.0)   | Yes | 15<br>(39.5) | 23<br>(60.5) | 0<br>(0.0) | 93<br>(93.0) | 7<br>(7.0) | 0<br>(0.0) | Yes | 21<br>(8, 8, 5) |

Note. Reference numbers refer to the Reference List that follows this table. Sources of cases (SC): 1 = Alzheimer’s disease (AD), 2 = Vascular AD; Sources of controls (SCT): 1 = healthy adults, 2 = adults without dementia or AD; HWE = Hardy-Weinberg equilibrium; HWE updated from the original report based on our calculations using the formula available at <http://www.koonec.com/k-blog/2010/06/20/hardy-weinberg-equilibrium-calculator>; Quality score ranges: Total score 0–29; external validity 0–11; internal validity 0–12; report quality 0–6; NA: Not available.

**Table S2.** Pooled Meta-Analysis: *MTHFR* A1298C Genotypes and Risks of Alzheimer's disease (AD).

| Genotype<br>(Number of<br>Studies) | AD Case<br>(N = 564)<br>n (%) | Control<br>(N = 741)<br>n (%) | Test of Heterogeneity |         |                    | Statistical<br>Model | Test of Association    |        |
|------------------------------------|-------------------------------|-------------------------------|-----------------------|---------|--------------------|----------------------|------------------------|--------|
|                                    |                               |                               | Q                     | p       | I <sup>2</sup> (%) |                      | Risk Ratio<br>(95% CI) | p      |
| CC (6)                             | 62 (10.99)                    | 66 (8.91)                     | 5.13                  | 0.2739  | 22.1               | Fixed                | 1.20 (0.87, 1.66)      | 0.2550 |
| AC (6)                             | 199 (35.28)                   | 302 (40.76)                   | 44.99                 | <0.0001 | 88.9               | Random               | 1.22 (0.79, 1.89)      | 0.3731 |
| AA (6)                             | 303 (53.72)                   | 373 (50.34)                   | 32.99                 | <0.0001 | 84.8               | Random               | 0.84 (0.61, 1.15)      | 0.2673 |

Note. Data included from 6 studies. Q = Cochran's Q; CI = confidence interval.
